# Supplementary material for: Gossypol induces apoptosis in ovarian cancer cells through oxidative stress
Source: Royal Society of Chemistry journal article supplement (doi:10.1039/c3mb25461e), 2013-03-01
Supplement: c3mb25461e_2.pdf [file c3mb25461e_2.pdf]

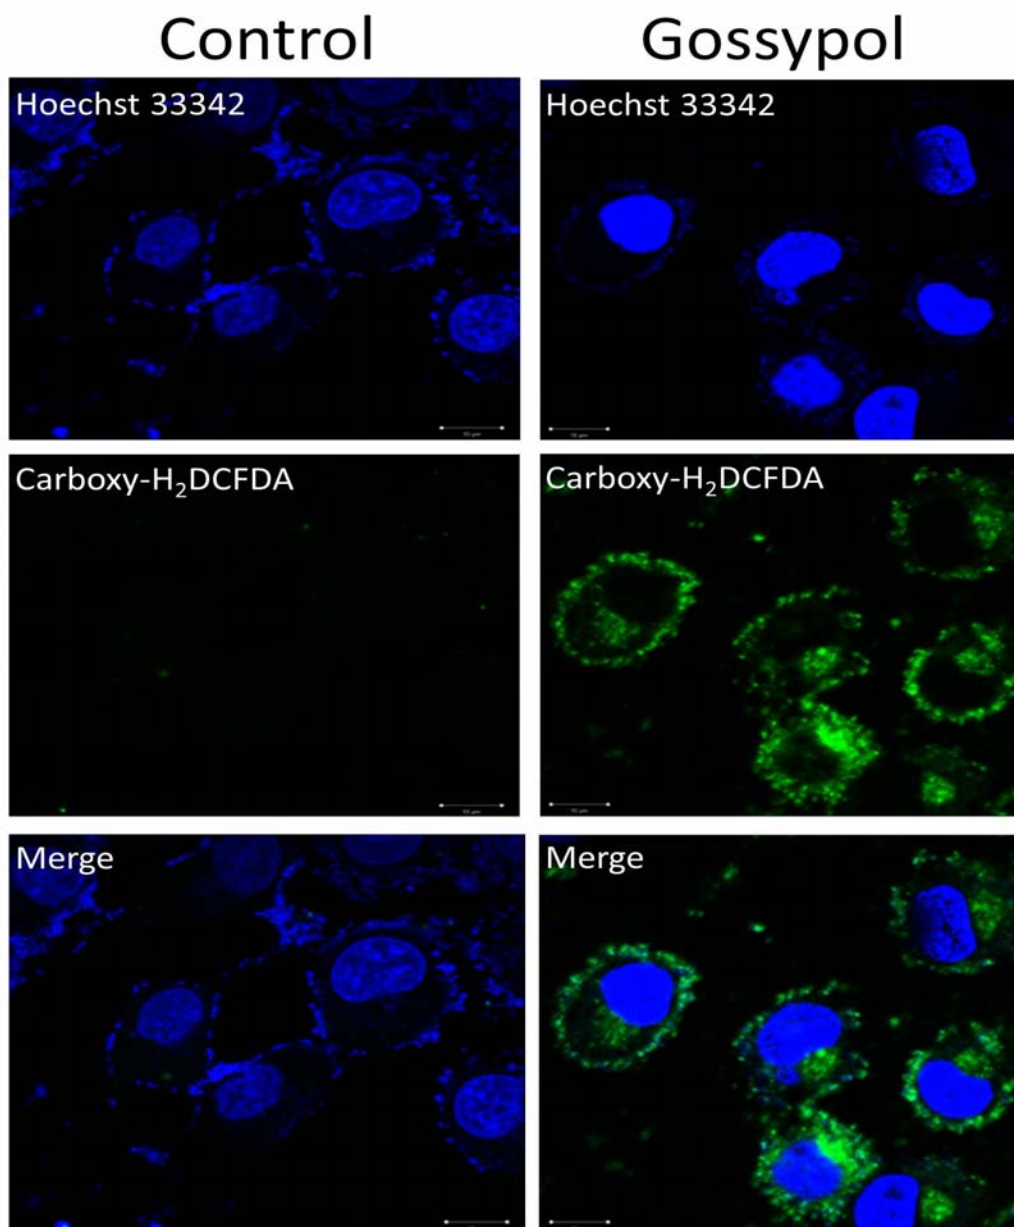

Supplementary Figure 1. Detection of ROS in untreated and gossypol-treated SKOV-3 cells using the Image-iT LIVE Reactive Oxygen Species (ROS) Kit. Cells were labeled with carboxy-H<sub>2</sub>DCFDA, which exhibited green fluorescence when reacted with ROS, and nuclei were stained with blue-fluorescent Hoechst 33342. (Left Column) Untreated SKOV-3 cells; and (Right Column) gossypol-treated SKOV-3 cells.
