# Supplementary material for: Gossypol induces apoptosis in ovarian cancer cells through oxidative stress
Source: Royal Society of Chemistry journal article supplement (doi:10.1039/c3mb25461e), 2013-03-01
Supplement: c3mb25461e_3.pdf [file c3mb25461e_3.pdf]

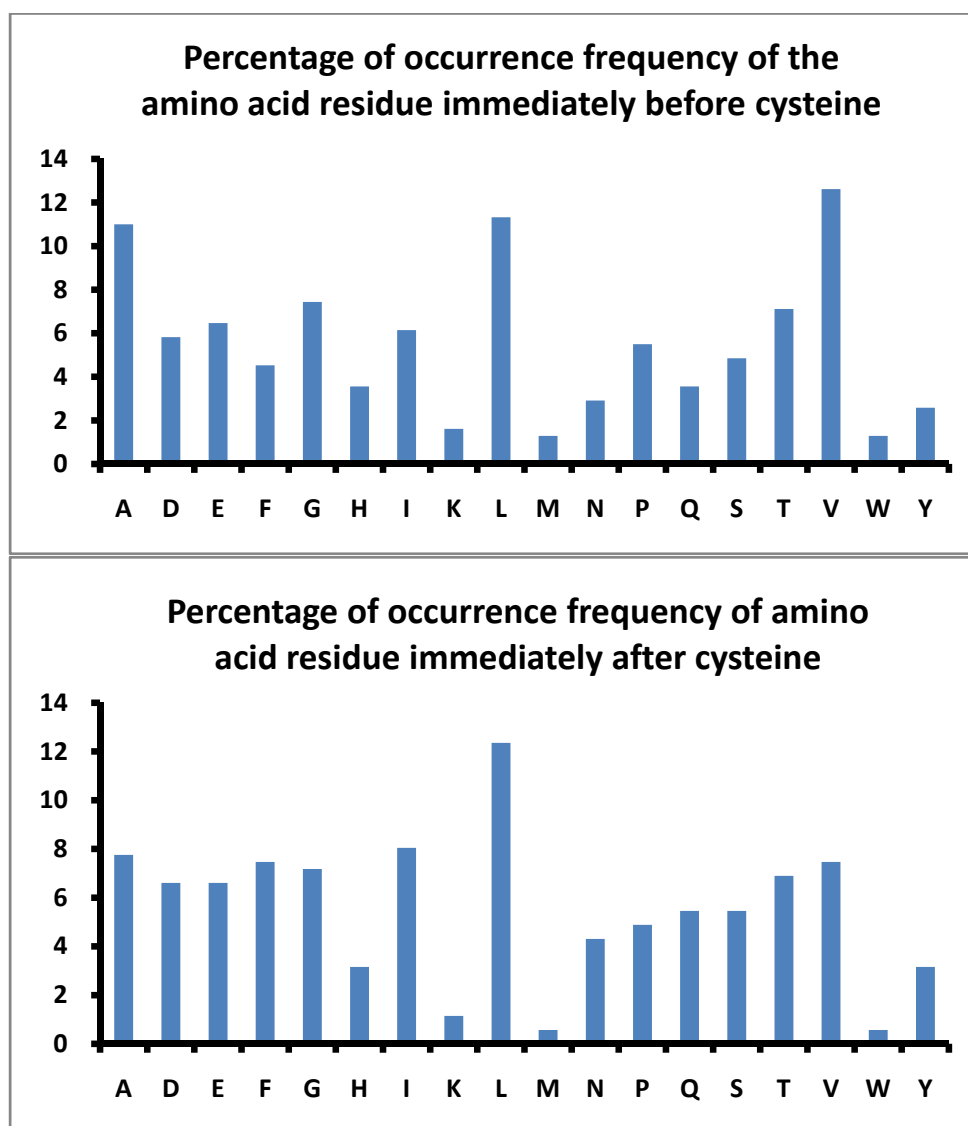

Supplementary Figure 1. The percentage of occurrence frequency of amino acids immediately before or after the Cysteine residue.
