# Supplementary material for: Gossypol induces apoptosis in ovarian cancer cells through oxidative stress
Source: Royal Society of Chemistry journal article supplement (doi:10.1039/c3mb25461e), 2013-03-01
Supplement: c3mb25461e_4.pdf [file c3mb25461e_4.pdf]

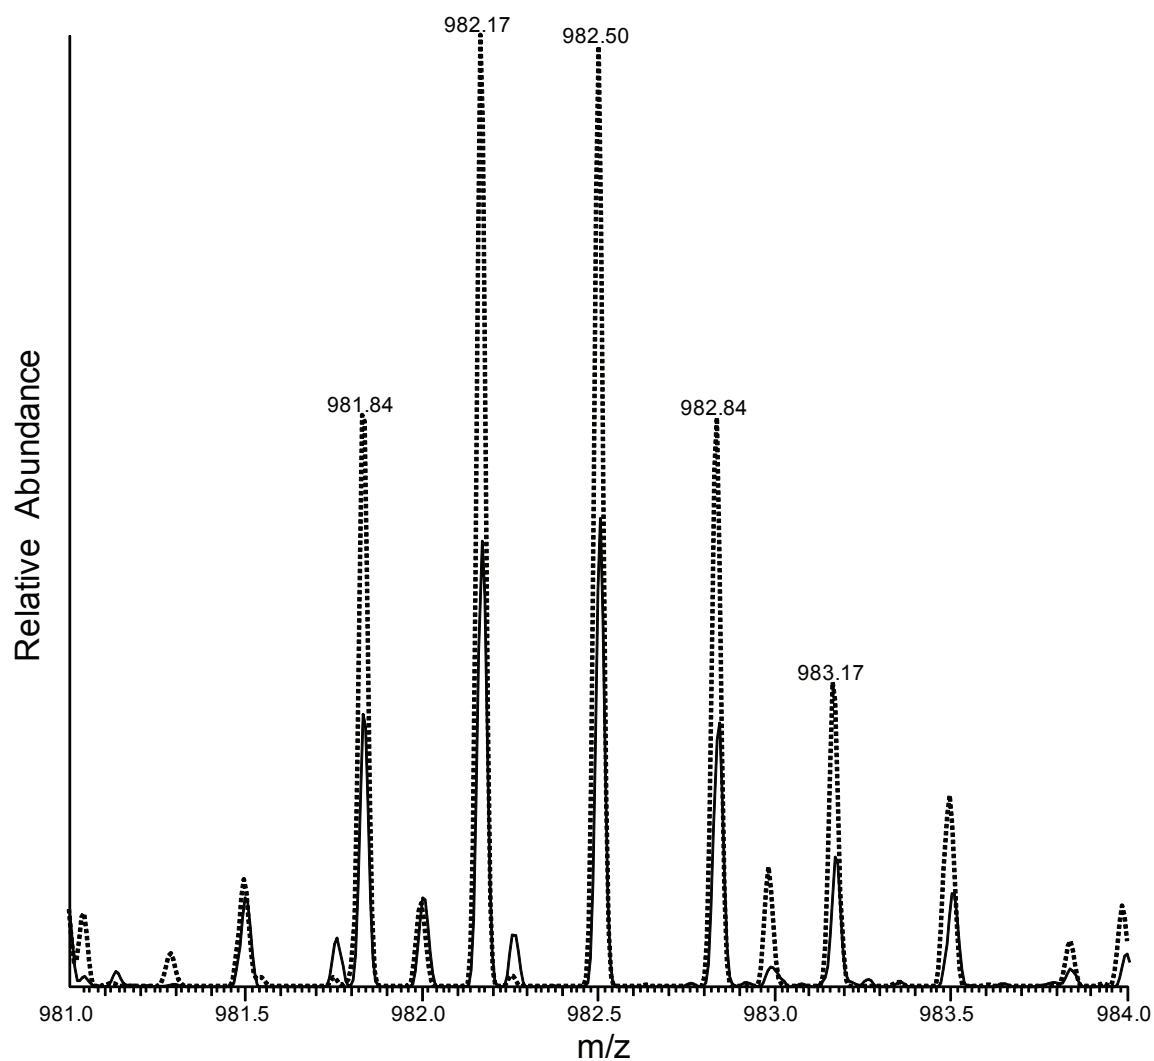

Supplementary Figure 2. The ion intensities of the glutathionylated Cys447-containing peptide C(447)IPALDSLTPANEDQKIGIEIIKR from HSP60 that is observed at  $m/z=981.84$  for triply charged peptide ions. The dotted line represents the peptide from the untreated cells, and the solid line represents the peptide from gossypol-treated cells.
